# Supplementary material for: A promising cellulose-based polyzwitterion with pH-sensitive charges
Source: publisher site journal article supplement (doi:10.3762/bjoc.10.159), 2014-07-08
Supplement: Additional file 1 [file 1860-5397-10-159-S1.pdf]

## Supporting Information

for

# A promising cellulose-based polyzwitterion with pH-sensitive charges

Thomas Elschner and Thomas Heinze\*

Address: Center of Excellence for Polysaccharide Research, Institute for Organic Chemistry and Macromolecular Chemistry, Friedrich Schiller University of Jena, Humboldtstraße 10, D-07743 Jena, Germany

Email: Thomas Heinze - thomas.heinze@uni-jena.de

\* Corresponding author

### Relative viscosity of an aqueous solution of cellulose carbamate **7a** in dependence on pH value

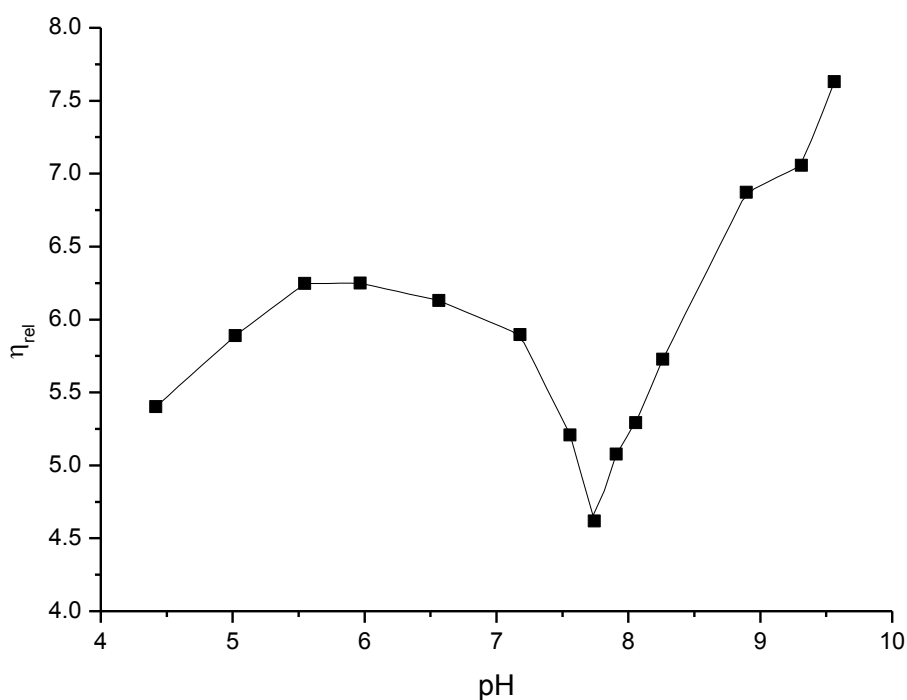

**Figure S1:** Relative viscosity ( $\eta_{rel}$ ) of an aqueous solution of (2-carboxyethyl)(2-aminoethyl)-cellulose carbamate (**7a**, 2% in 0.2 M aqueous NaCl) in dependence on pH value determined by rotational viscometry.
